# Supplementary material for: Hypertension Associated Characteristics of Gut Archaea and Their Interaction Network with Bacteria
Source: bioRxiv or medRxiv preprint supplement (doi:10.1101/2024.04.25.24305417), 2026-04-27

Figure S1

**A**

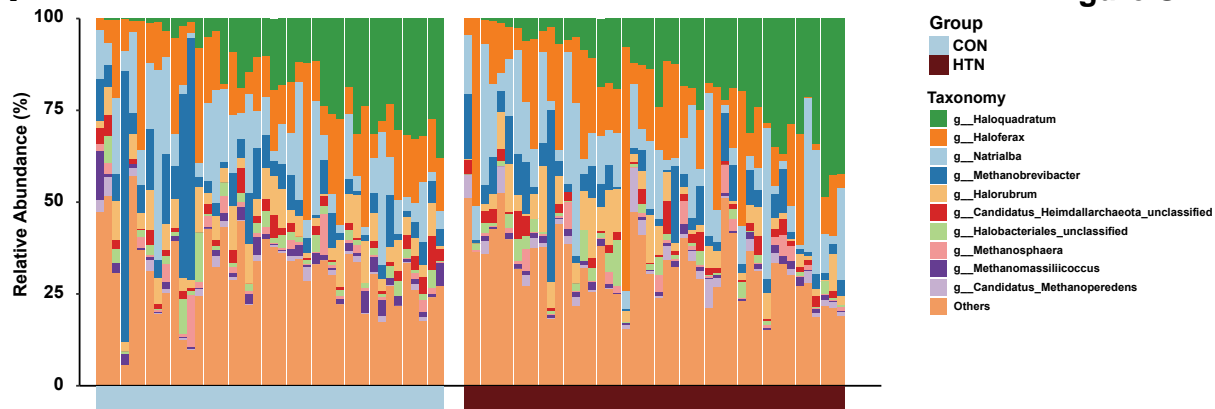

**B**

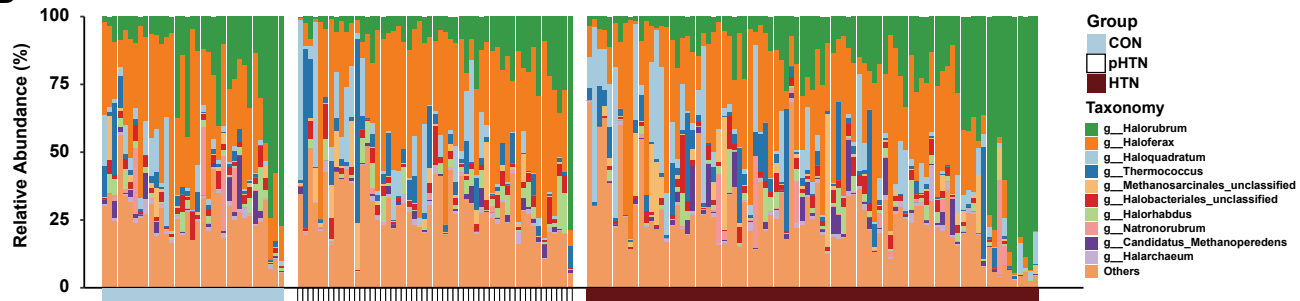

**C**

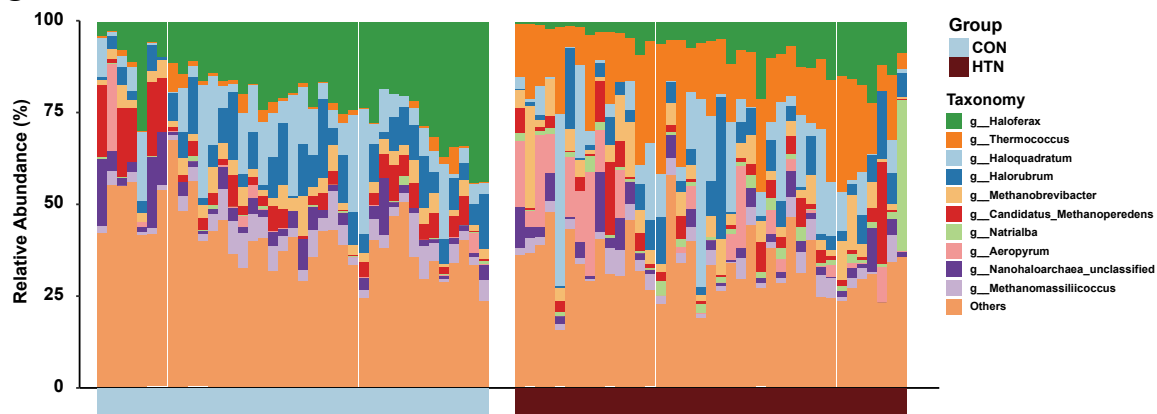

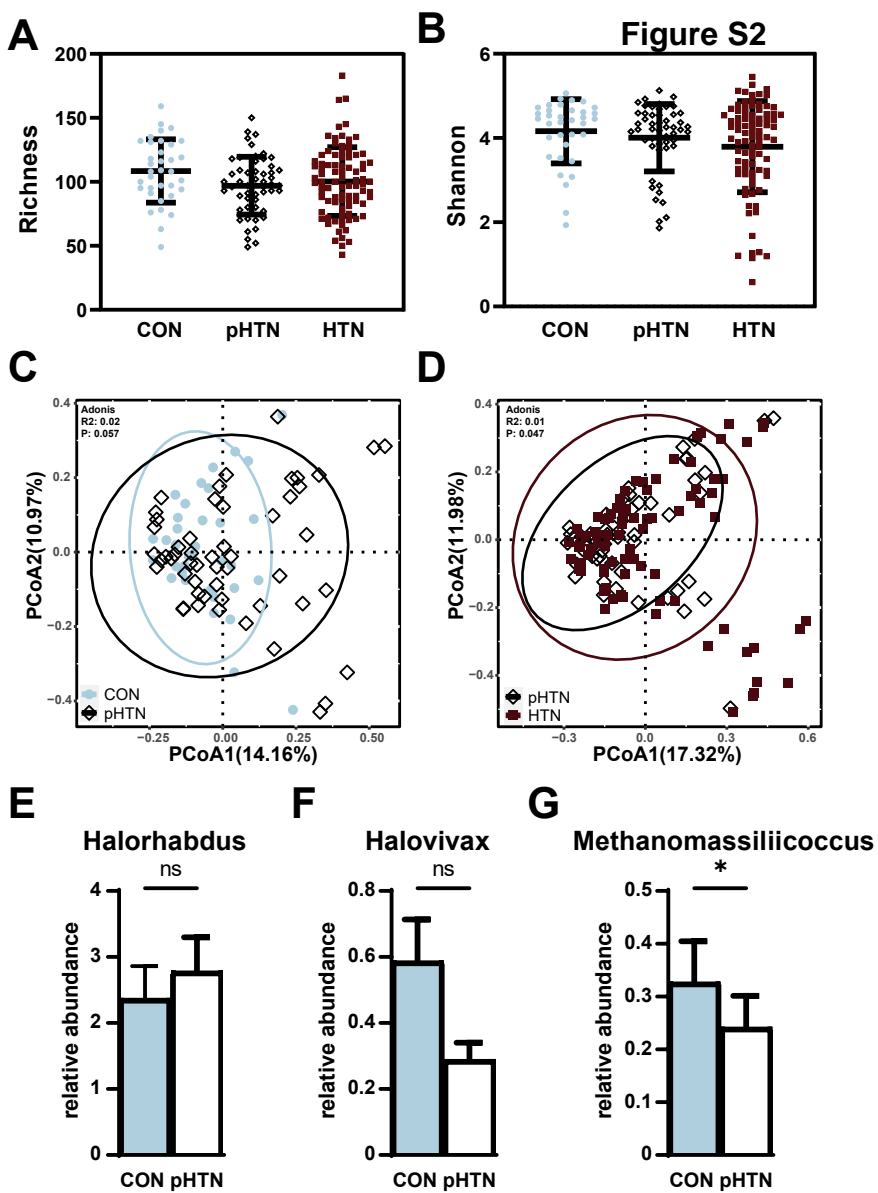

# A

Candidatus\_Methanomassiliicoccus\_intestinalis

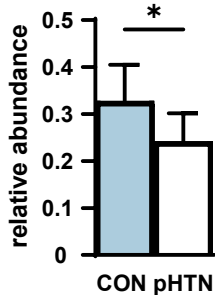

# B

Halorubrum\_lipolyticum

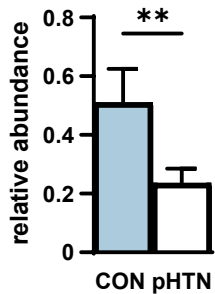

# C

Figure S3

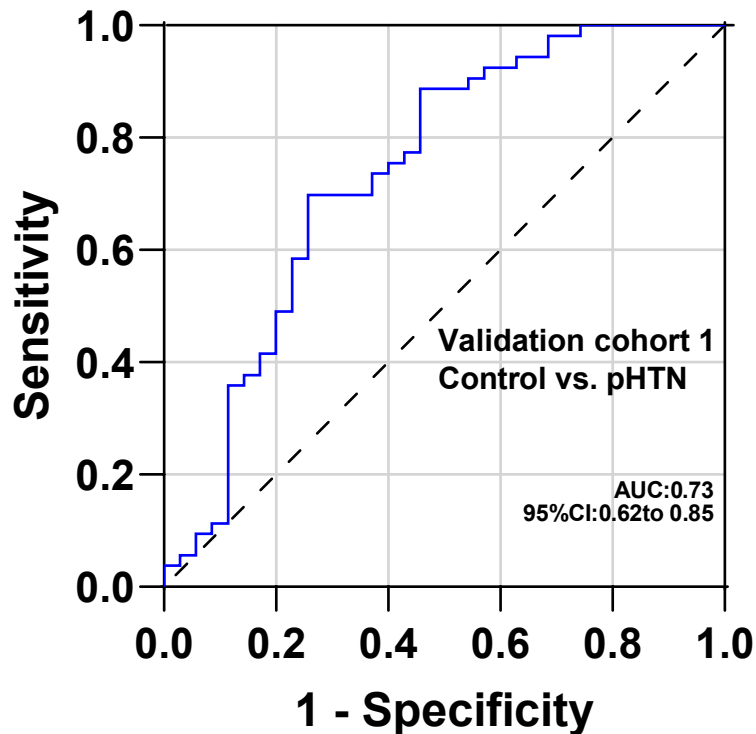

Supplement: Supplementary file [file media-2.pdf]
